# Supplementary material for: Synthesis of fluorescent derivatives of praziquantel: cell-imaging and interaction with Schistosoma japonicum cercariae
Source: Royal Society of Chemistry journal article supplement (doi:10.1039/c3ob41348a), 2013-01-01
Supplement: c3ob41348a.pdf [file c3ob41348a.pdf]

## Supporting Information

Novel fluorescent derivative of praziquantel synthesis: cell-imaging and  
interaction with *Schistosoma japonicum* cercariae

Yunzhi Xie,<sup>a,†</sup> Yibao Li,<sup>a,†</sup> Yongquan Wu,<sup>a,†</sup> Chunhua Liu,<sup>a</sup> Xiaokang Li,<sup>a</sup> Xun Li<sup>a</sup> and Xiaolin  
Fan<sup>\*a</sup>

Key Laboratory of Organo-pharmaceutical Chemistry, Gannan Normal University, Ganzhou  
341000, P. R. China.

E-mail: fanxl2013@gnnu.cn

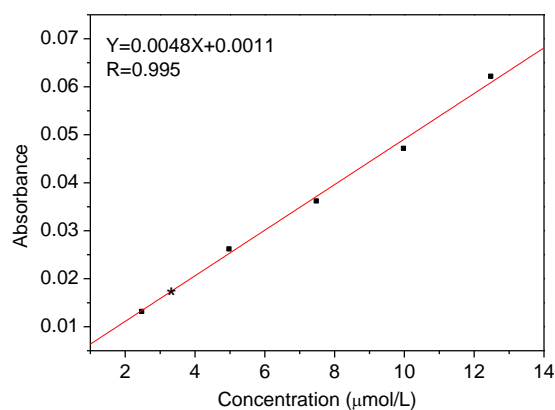

**Figure S1.** Absorbance of PZQ-5 in pure water. Absorbance = 0.018, Concentration =  
3.52 μmol/L.

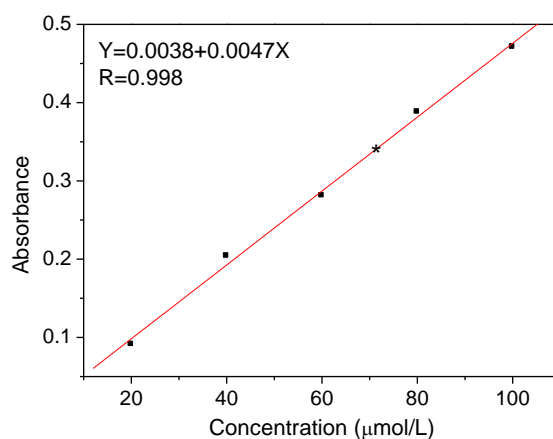

**Figure S2.** Absorbance of PZQ-5 in DMSO: PBS = 1:399. Absorbance = 0.342,  
Concentration = 71.96 μmol/L.

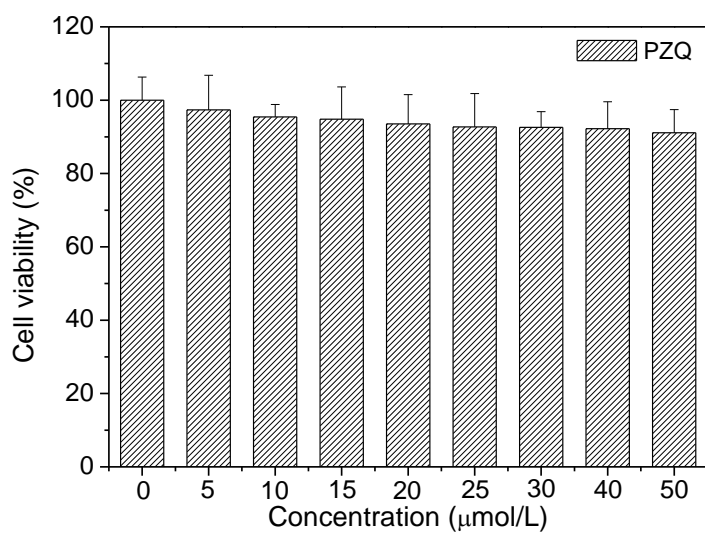

**Figure S3.** Cell survival viability detected by MTT method: HeLa cells incubated with the presence of 5~50 µmol/L PZQ for 24 h.

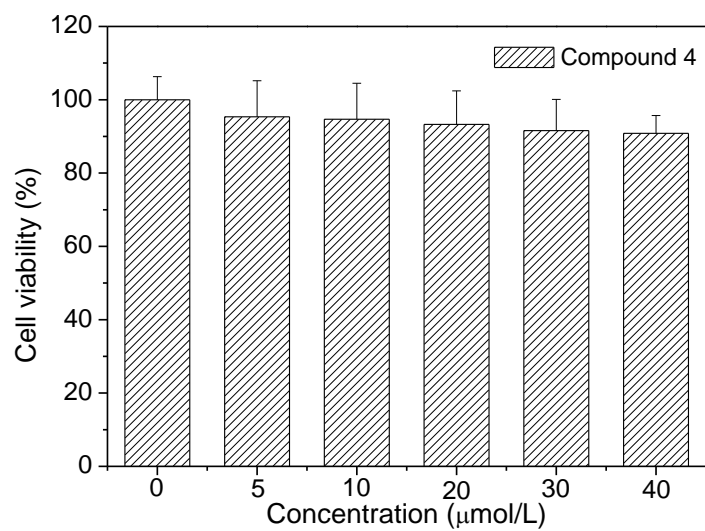

**Figure S4.** Cell survival viability detected by MTT method: HeLa cells incubated with the presence of 5~40 µmol/L compound 4 for 24 h.

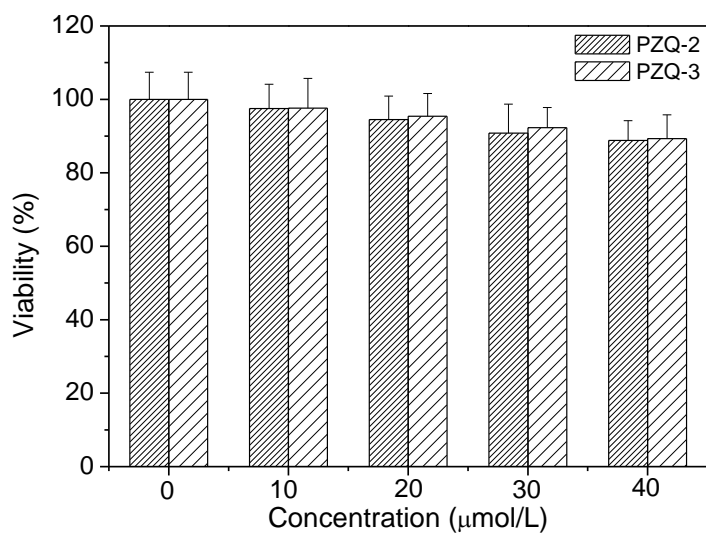

**Figure S5.** Cell viability (%) estimated by MTT proliferation test versus incubation concentrations of PZQ-2 and PZQ-3. HeLa cells were cultured in the presence of 0 ~ 40 μmol/L PZQ-2 and PZQ-3 at 37 °C for 24 h.

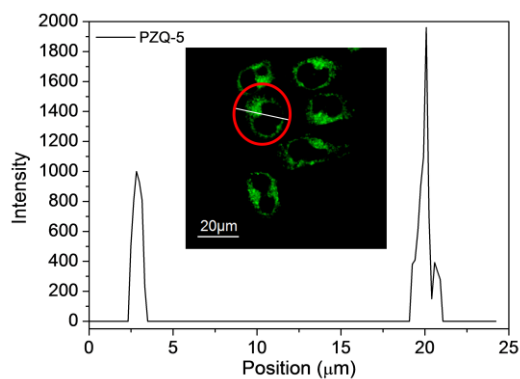

**Figure S6.** The fluorescence intensity profile and fluorescence image (across the line) of HeLa cells incubated with PZQ-5.
